# Supplementary material
Source: PubMed Central journal article supplement (PMC6459420)

Figure S1

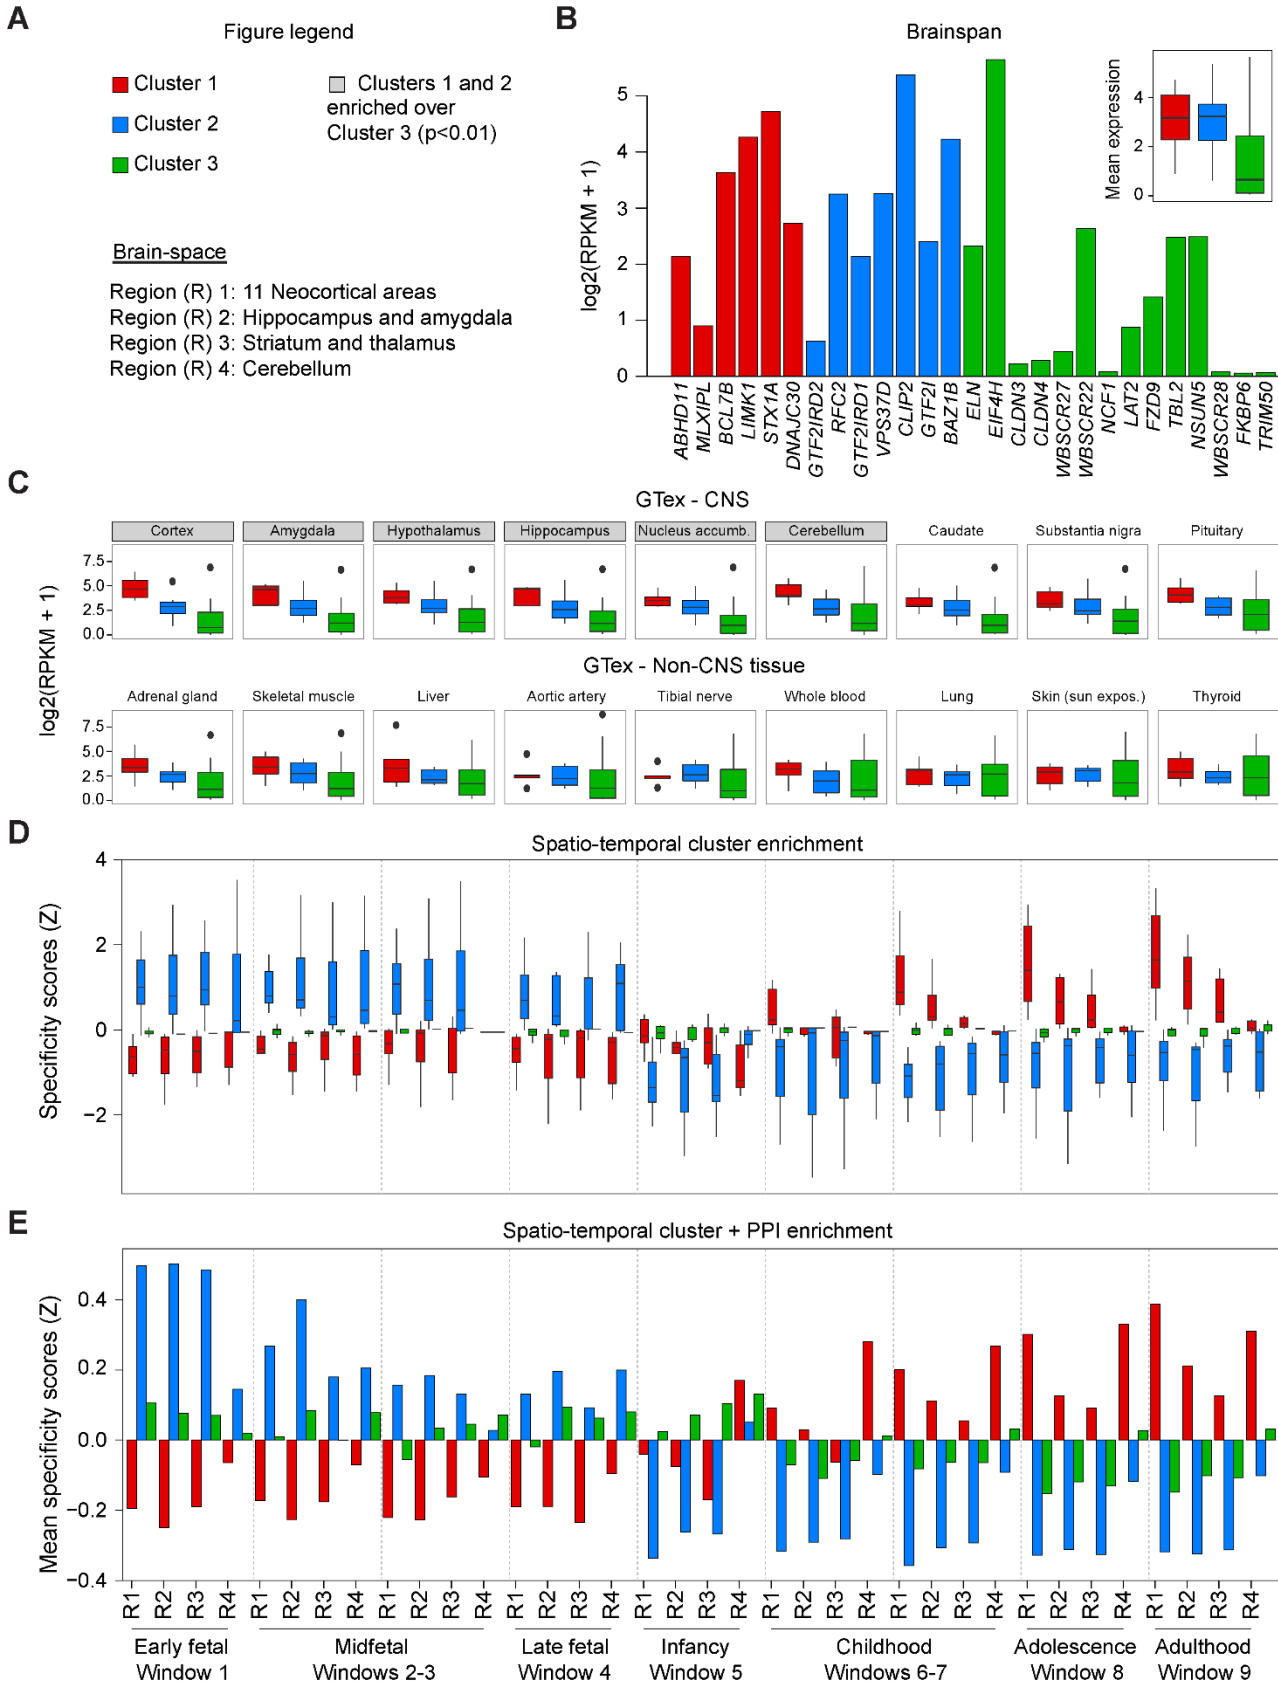

Figure S2

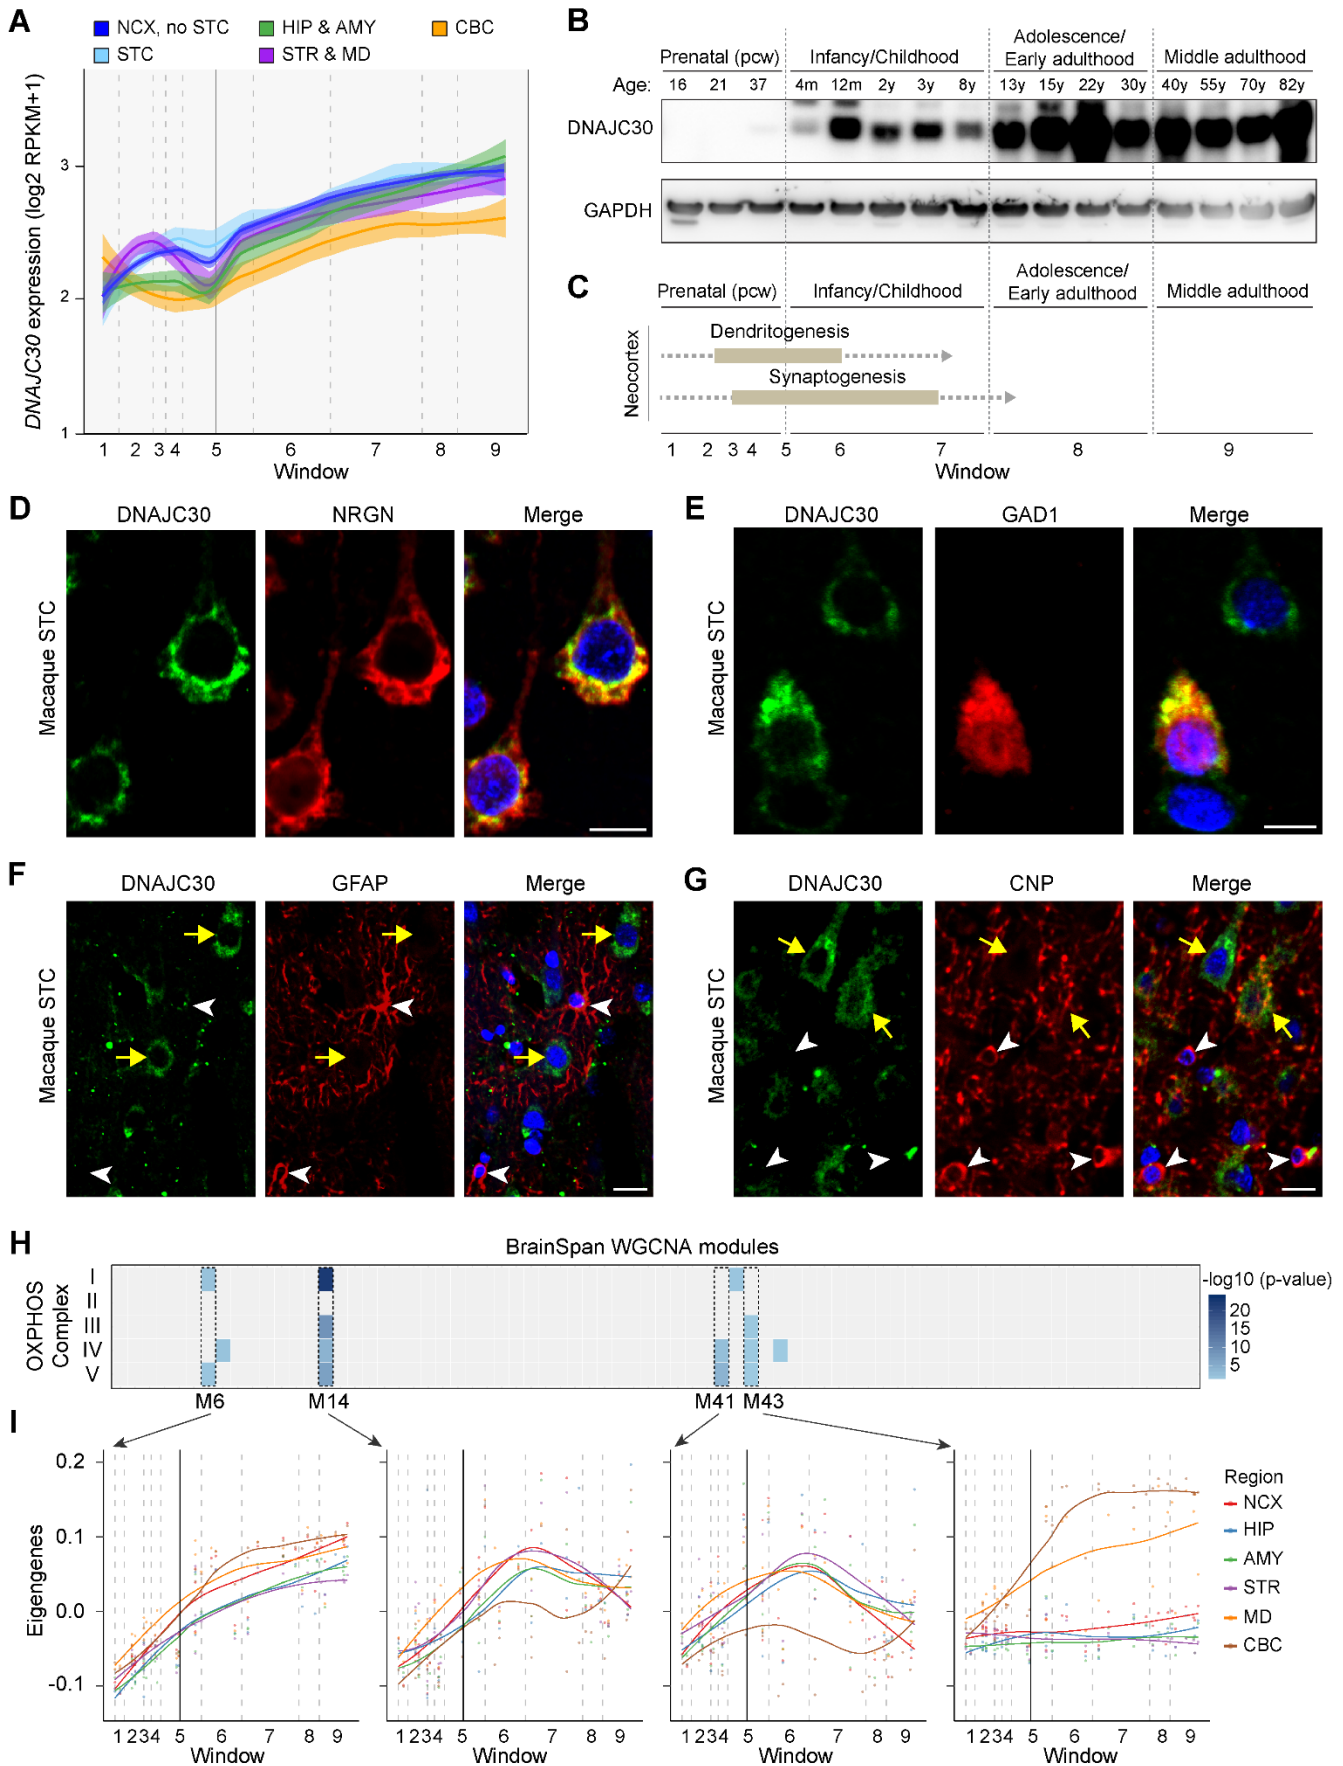

Figure S3

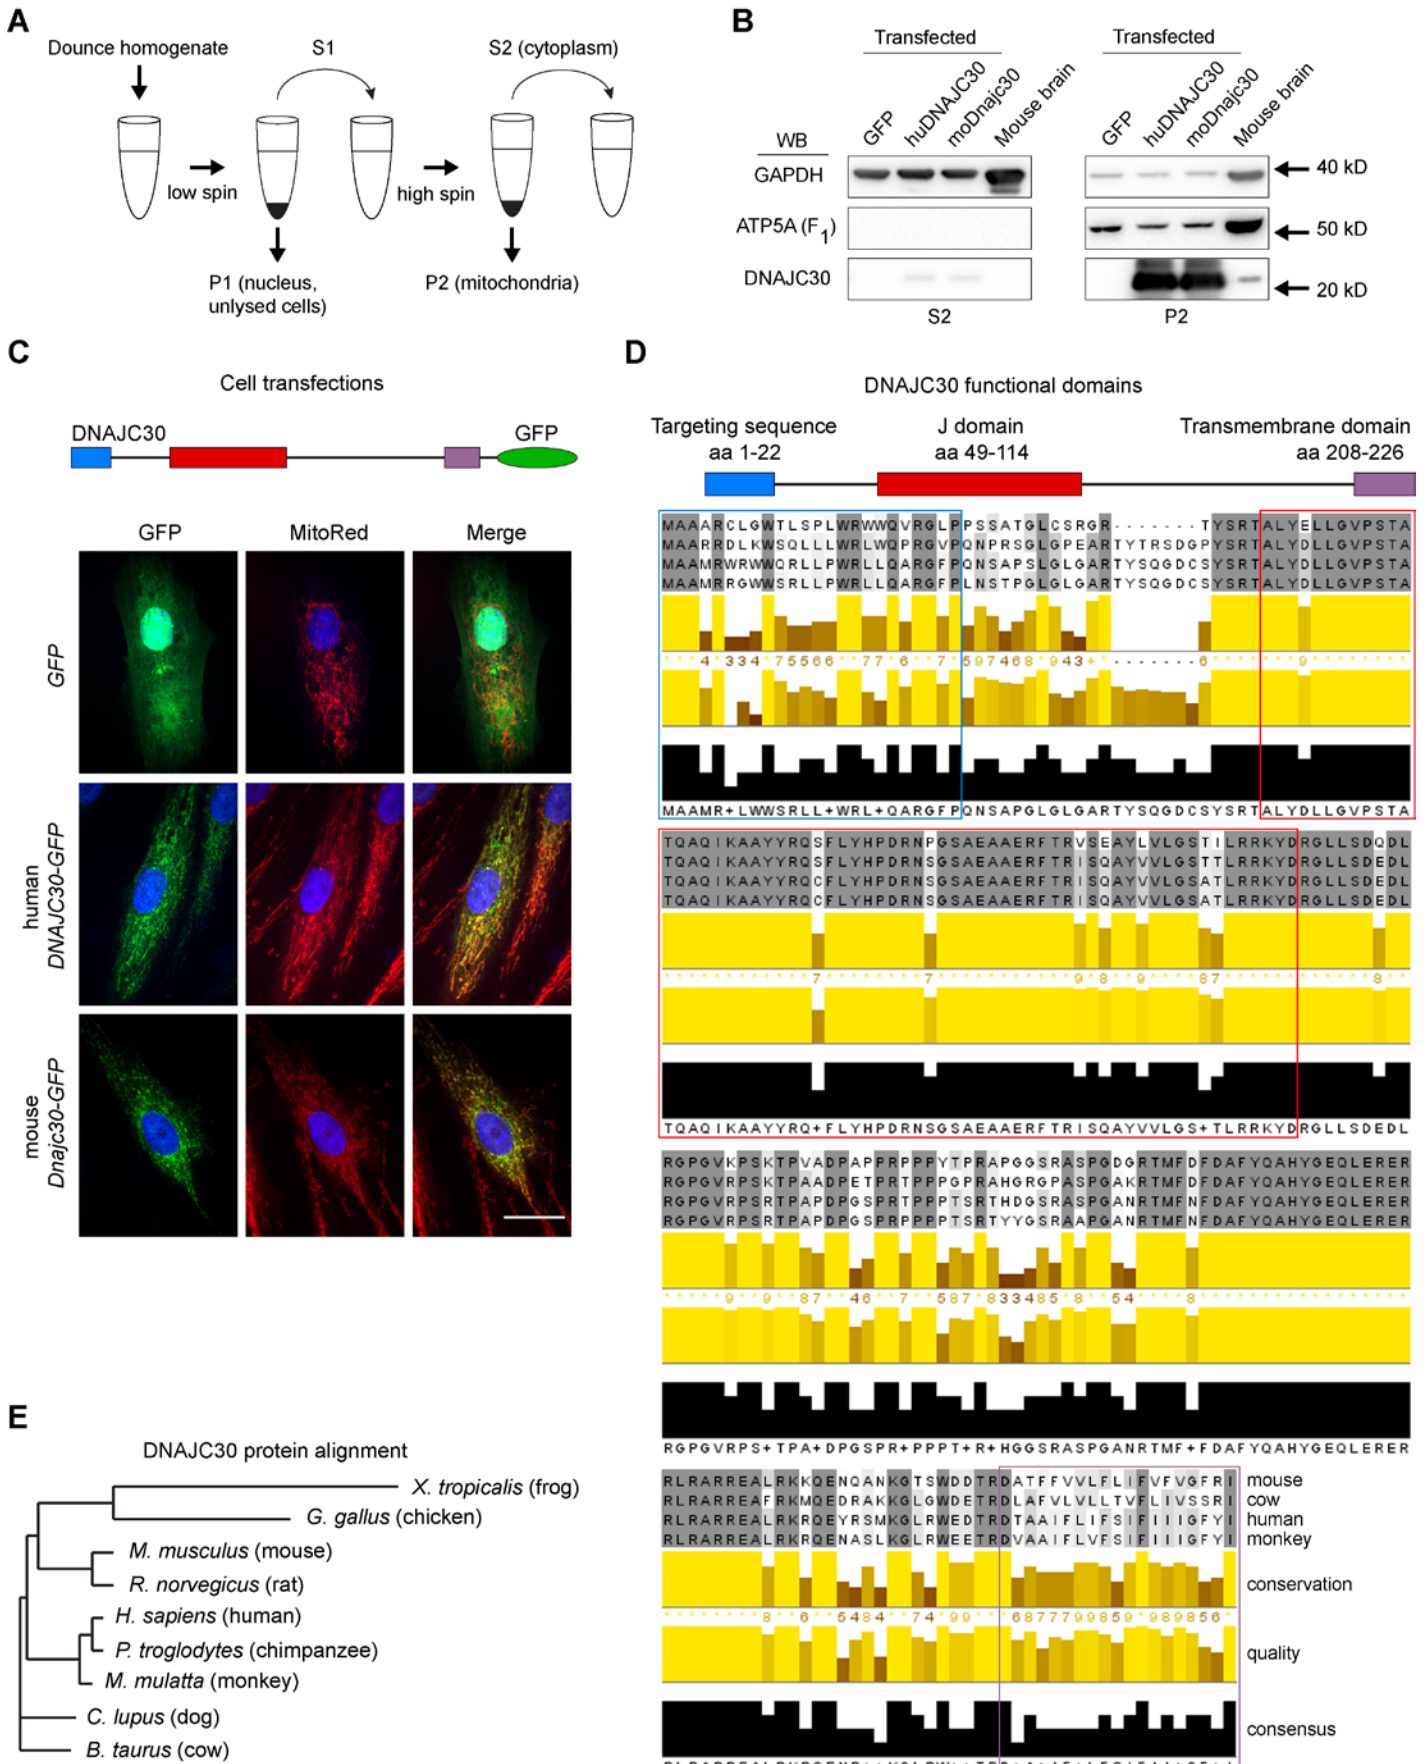

Figure S4

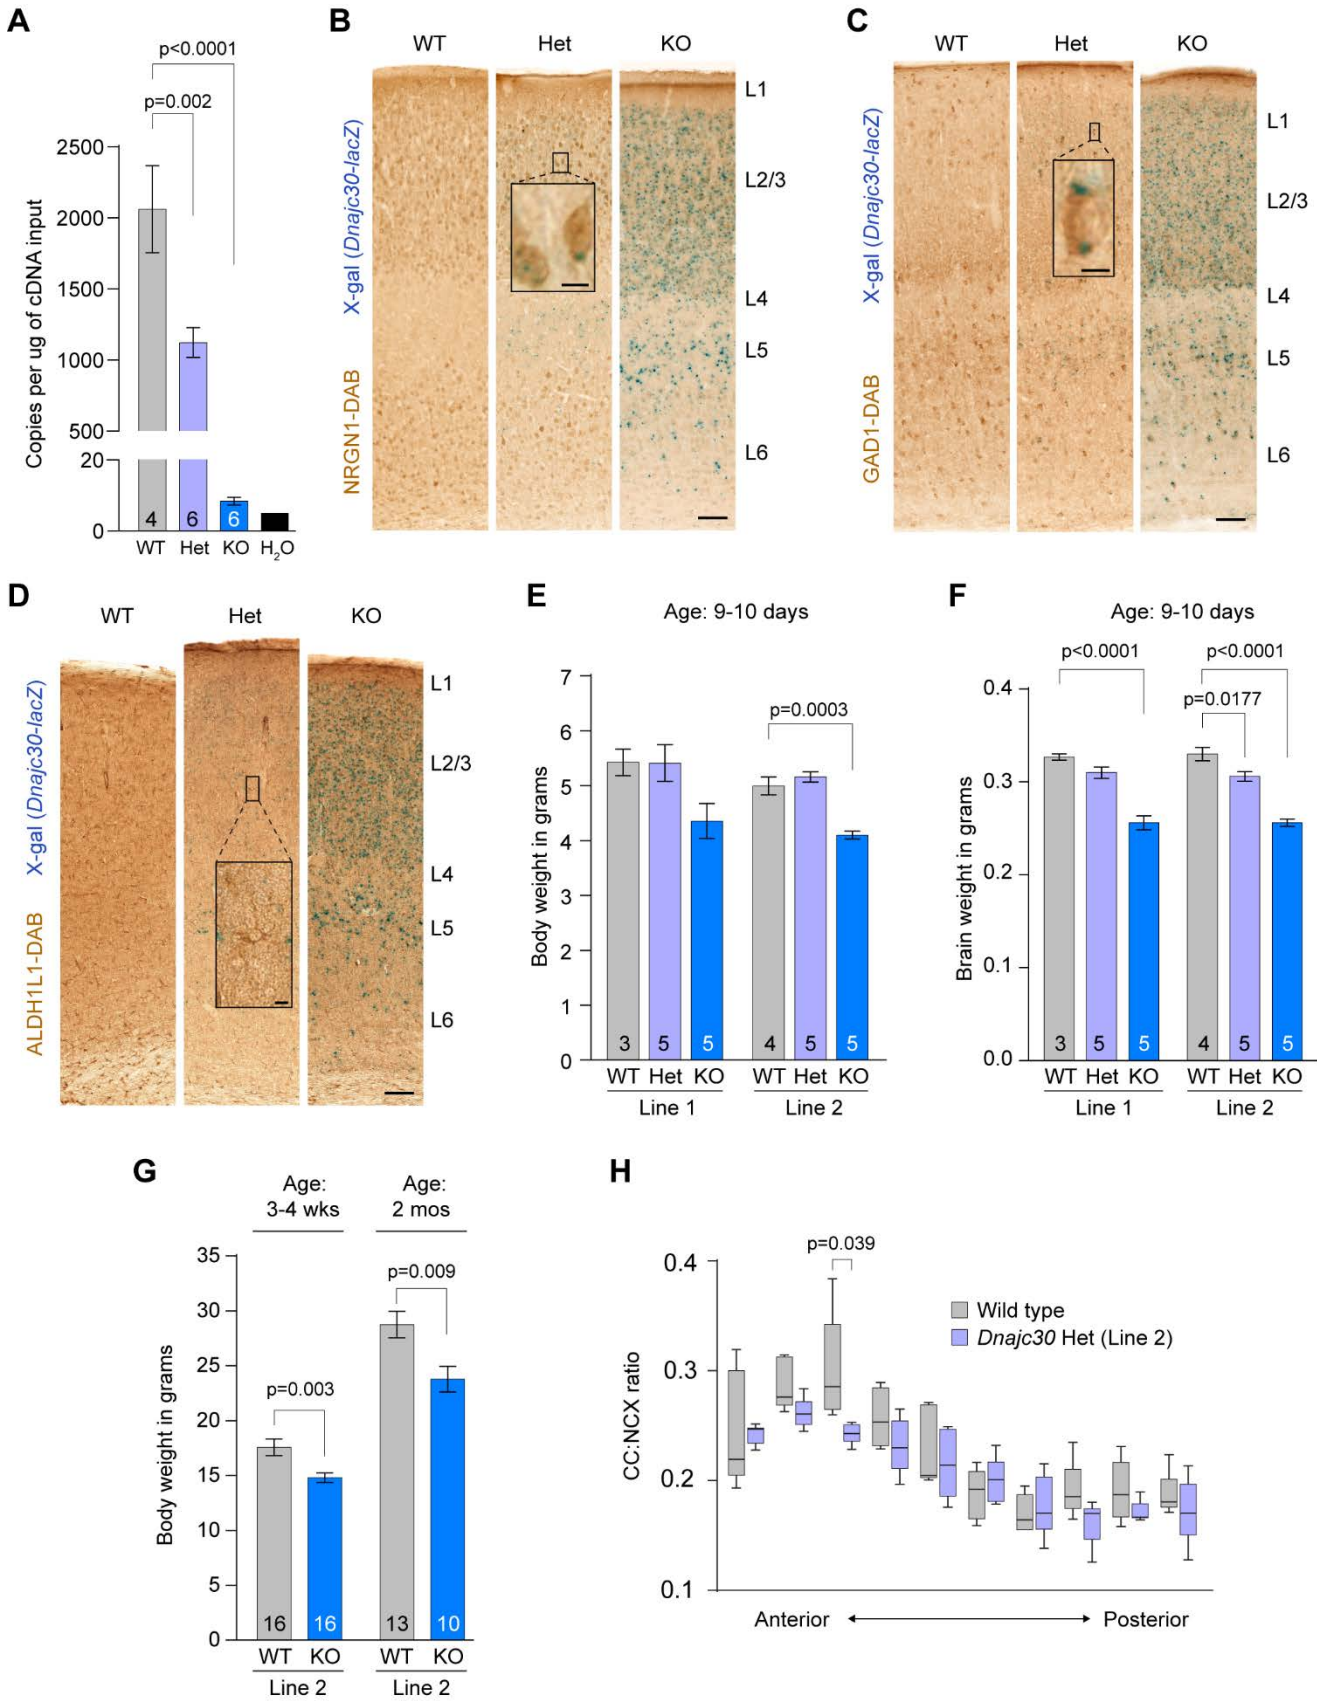

Figure S5

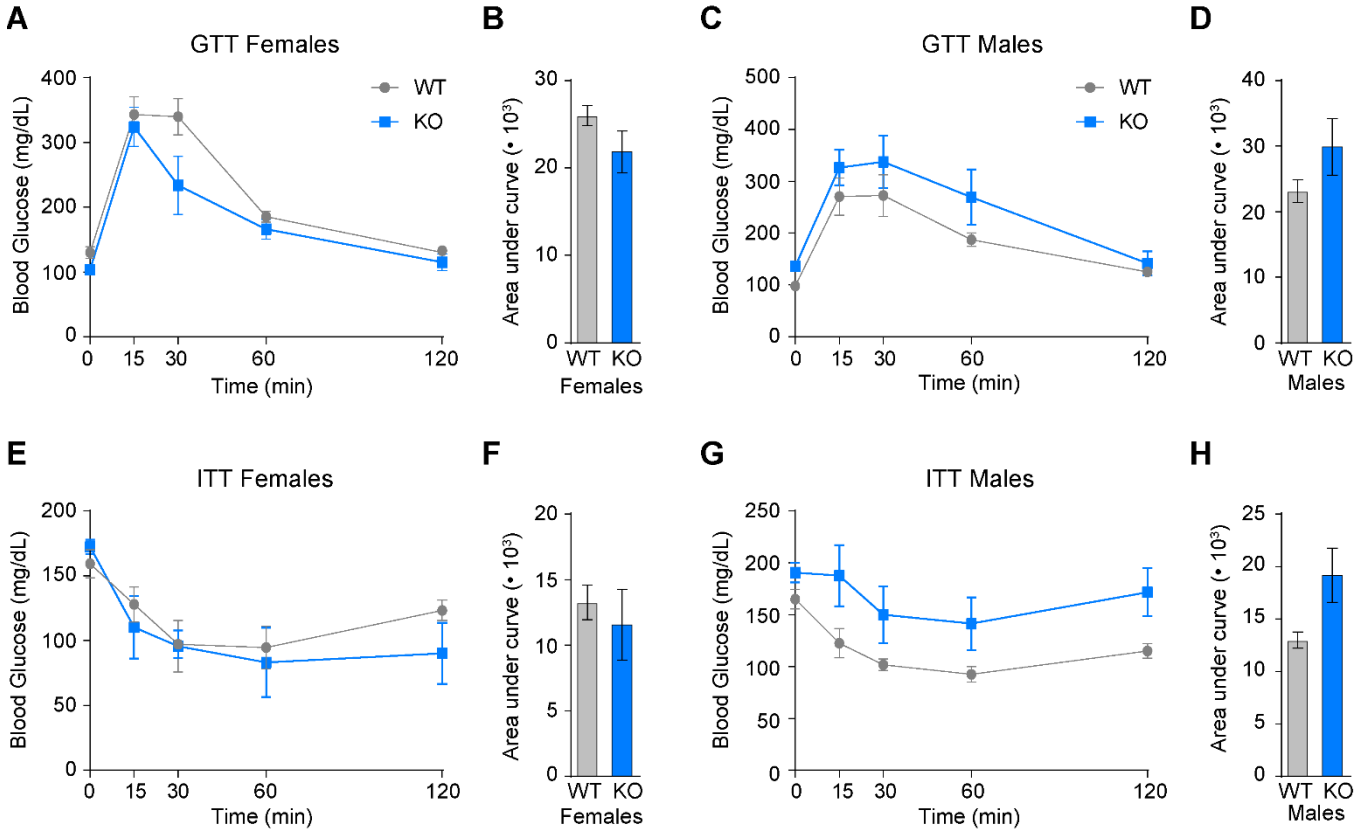

Figure S6

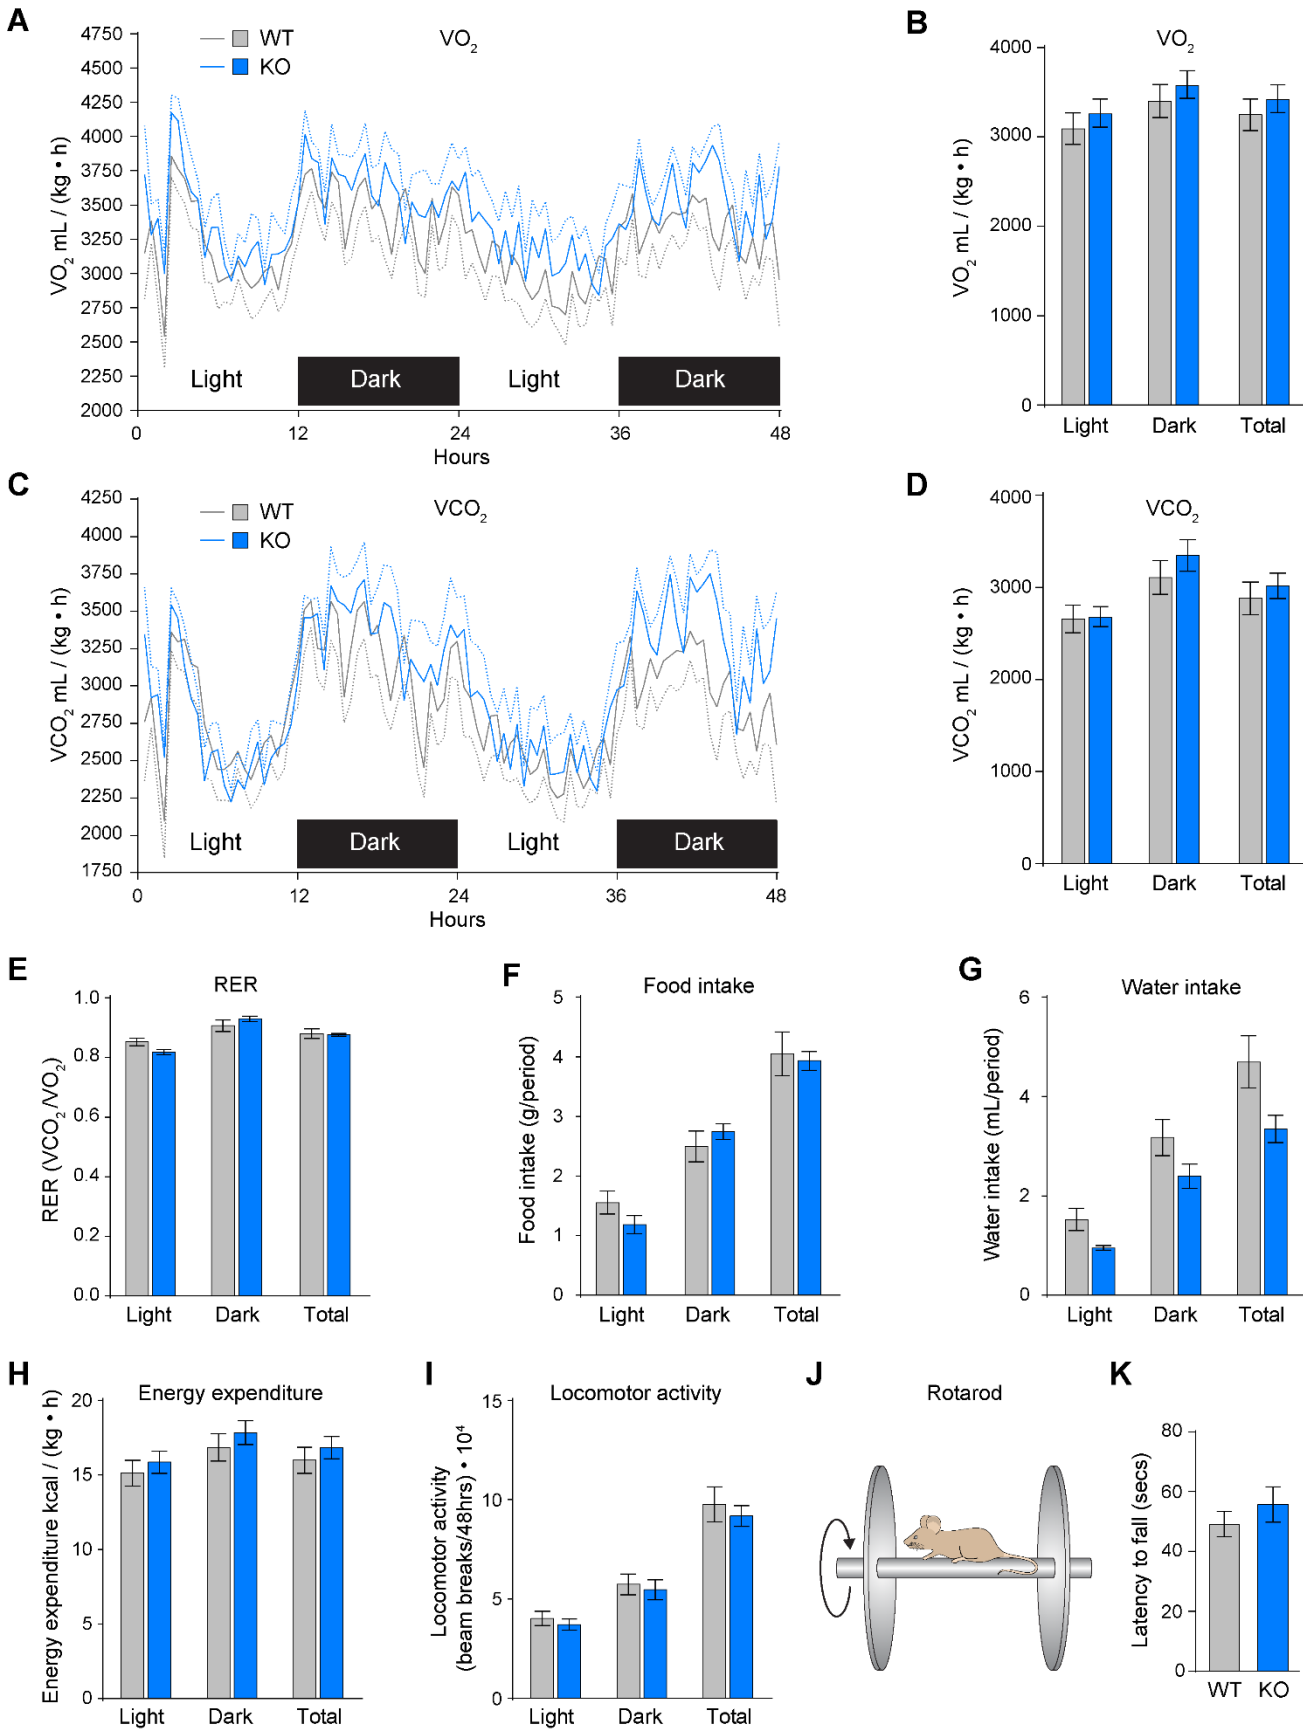

Figure S7

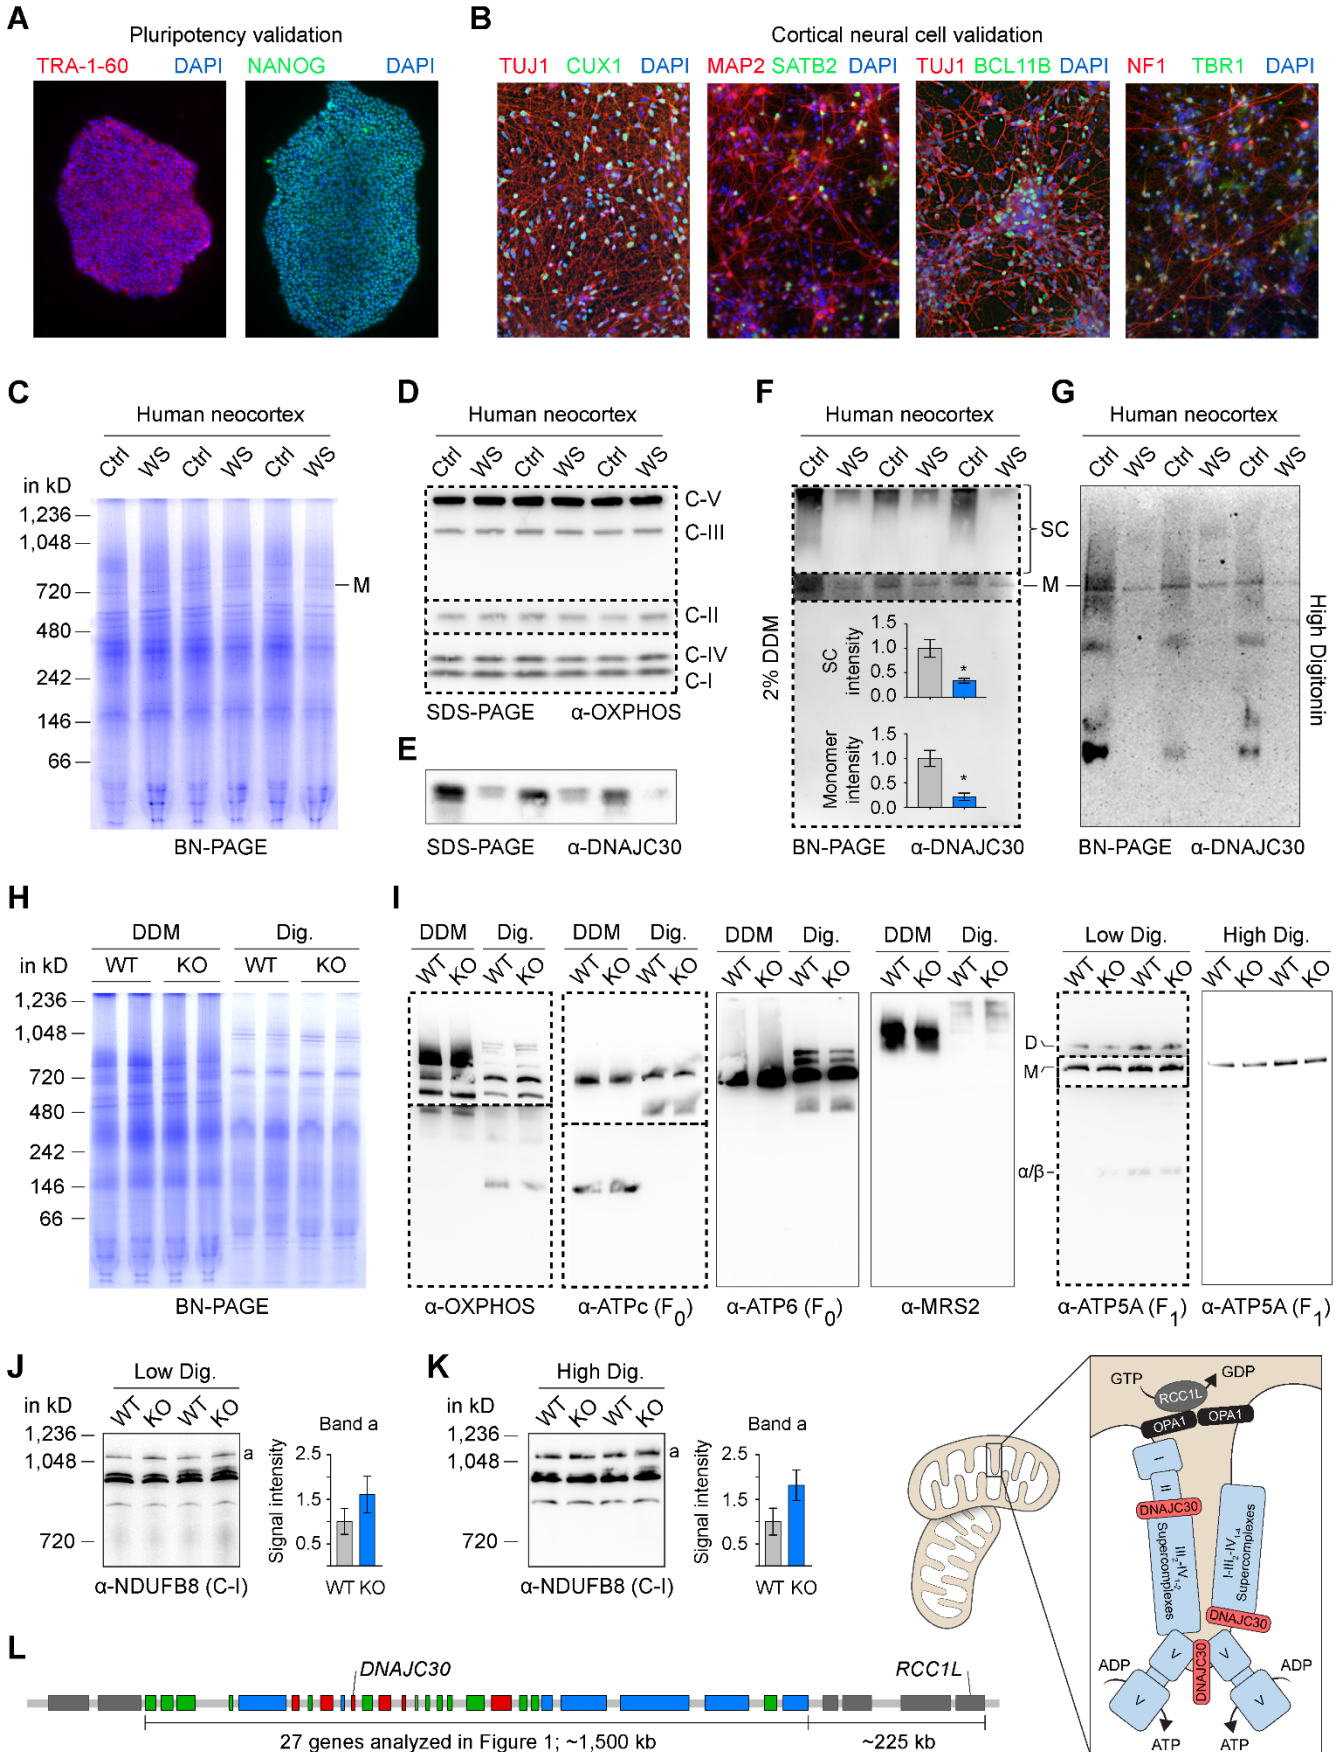

Supplement: NIHMS1002769-supplement-7.pdf [file NIHMS1002769-supplement-7.pdf]
